# Supplementary material
Source: PubMed Central journal article supplement (PMC3120136)
Supplement: NIHMS226496-supplement-Supplementary_Data.pdf [file NIHMS226496-supplement-Supplementary_Data.pdf]

**Resonance Raman Characterization of the Peroxo and Hydroperoxo  
Intermediates in Cytochrome P450**

**Supporting Information**

Ilia G. Denisov<sup>1</sup>, Piotr J. Mak<sup>2</sup>, Thomas M. Makris<sup>1</sup>, Stephen G. Sligar<sup>1,3,4</sup>, James R. Kincaid<sup>2</sup>

Department of Biochemistry<sup>1</sup>, Chemistry<sup>3</sup>, and College of Medicine<sup>4</sup>, University of Illinois,  
Urbana, IL 61801, and Department of Chemistry<sup>2</sup>, Marquette University, Milwaukee, WI 53233

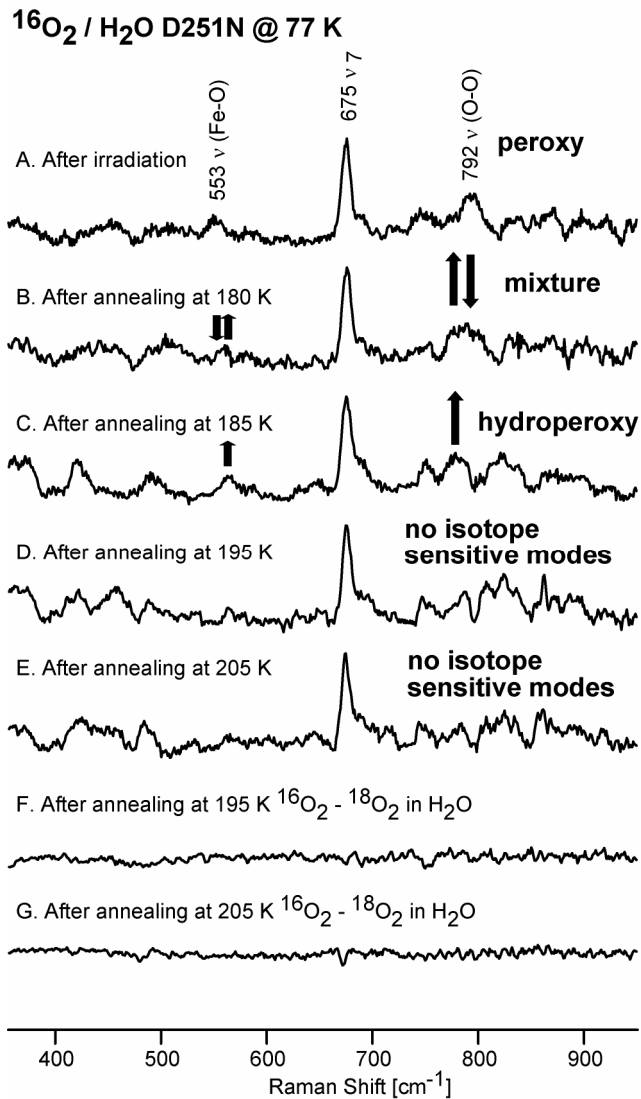

Figure S1. The resonance Raman spectra of irradiated and annealed at different temperature samples of D251N CYP101 in  $\text{H}_2\text{O}$  buffer: immediately after irradiation (A); after annealing at 180 K (B); after annealing at 185 K (C); after annealing at 195 K (D), and after annealing at 205 K (E). Two bottom traces shows difference spectra between  $^{16}\text{O}_2 - ^{18}\text{O}_2$  in  $\text{H}_2\text{O}$  of the samples annealed at 195 K (F) and at 205 K (G) (excitation at 442, temperature 77 K).

Table S1. Calculated parameters of Fe-O-O in [4], [5a], and [5b]

| System | Fe-O, Å         | O-O, Å     | Fe-O-O, deg | Ref                |
|--------|-----------------|------------|-------------|--------------------|
| [4]    | 1.82-2.0        | 1.31-1.37  |             | <sup>1</sup>       |
| [5a]   | 1.99            | 1.41       |             | “                  |
| [5b]   | 1.86-1.87(1.82) | 1.52(1.45) |             | “ ( <sup>2</sup> ) |
| [4]    | 1.94            | 1.32       |             | <sup>3</sup>       |
| [5b]   | 1.80            | 1.44       |             |                    |
| [4]    | 1.95            | 1.31       | 119         | <sup>4</sup>       |
| [5a]   | 1.99            | 1.33       | 121         |                    |
| [5b]   | 1.88            | 1.46       | 117         |                    |
| [4]    | 1.81            | 1.29       |             | <sup>5</sup>       |
| [5a]   | 1.92            | 1.31       |             |                    |
| [5b]   | 1.85            | 1.45       |             |                    |
| [4]    | 1.82            | 1.31       |             | <sup>6</sup>       |
| [5a]   | 1.95            | 1.33       |             |                    |
| [5b]   | 1.89            | 1.46       |             |                    |

### References

- (1) Shaik, S.; Kumar, D.; de Visser, S. P.; Altun, A.; Thiel, W. *Chem. Rev.* **2005**, *105*, 2279-2328.
- (2) Kumar, D.; Hirao, H.; De Visser, S. P.; Zheng, J.; Wang, D.; Thiel, W.; Shaik, S. *J. Phys. Chem. B* **2005**, *109*, 19946-19951.
- (3) Guallar, V.; Friesner, R. A. *J. Am. Chem. Soc.* **2004**, *126*, 8501-8508.
- (4) Rydberg, P.; Sigfridsson, E.; Ryde, U. *J. Biol. Inorg. Chem.* **2004**, *9*, 203-223.
- (5) Hackett, J. C. Computational Investigations of Cytochrome P450 Aromatase Catalysis and Biological Evaluation of Isoflavone Inhibitors. Ph.D. Thesis, Ohio State University, 2004.
- (6) Loew, G. H.; Harris, D. L. *Chem. Rev.* **2000**, *100*, 407-419.
